# Supplementary material
Source: Springer Nature journal article supplement (https://www.springermedizin.de/resource/supplementary/12906_2013_1759_MOESM3_ESM.pdf/9522730)

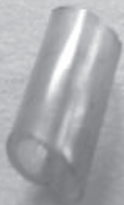

**A**

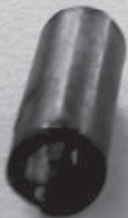

**B**

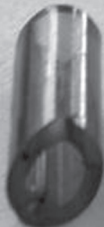

**C**

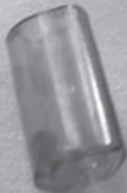

**D**

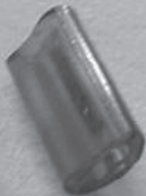

**E**

Supplement: MOESM3 [file 9522730]
